# Supplementary material
Source: publisher figshare collection journal article supplement (https://acs.figshare.com/ndownloader/files/3983071)
Supplement: Supplementary file 1 [file 3983071]

## 1 Supporting Information

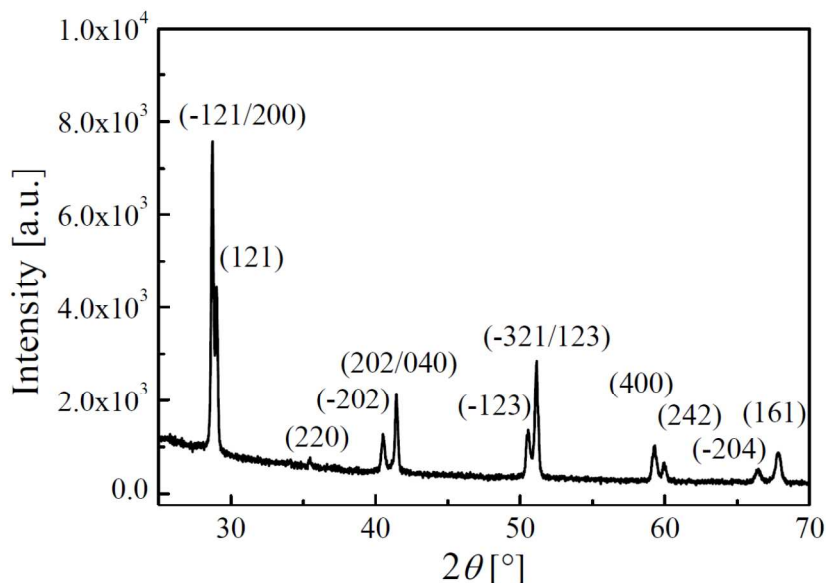

2

3 **Figure S1:** X-ray diffractogram of powder from the BCY20 pellet recorded with Cu K- $\alpha$   
4 radiation, confirming phase purity.

5 We have monitored the evolution of the spectral weight at 593 K of either peak in UHV  
6 condition in excess of 7 hours, collecting a total of 485 spectra. The heating profile is  
7 shown in Figure S2 a. The transient of the relative peak heights of  $O_x$  and O-H and their  
8 ratio  $O-H/O_x$  is displayed in Figure S2 b. The spectral weight of the hydroxyl groups is  
9 rapidly increasing, and the spectral weight of the structural oxygen is decreasing to the  
10 same extent. Overall, the ratio of the spectral weights increases sharply within 1 hour of  
11 keeping the temperature around 593 K, and then remains virtually constant for the  
12 following 6 hours.

13 We believe thus that the O-H groups are formed during annealing on the sample surface  
14 from residual water from exposure to ambient conditions, thus causing a relative decrease  
15 of the spectral weight from  $O_x$ . Comparison with thermogravimetry data (Figure S3 a,

16 adopted from  $\text{BaCe}_{0.85}\text{Yb}_{0.15}\text{O}_3$  in Ref. [11]) shows that surface water is released at 373 K  
 17 and structural water at 593 K, suggesting that structural oxygen  $\text{O}_x$  in BCY20 indeed  
 18 could be released from the sample at 593 K in UHV.

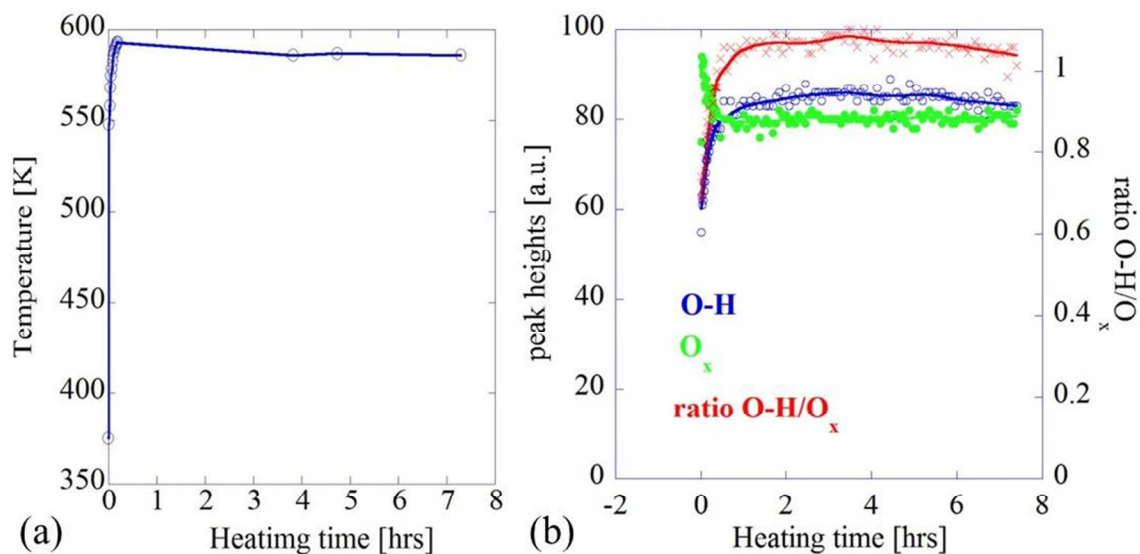

19  
 20 **Figure S2:** Heating profile (left) and evolution of spectral weight (right) of the O1s core  
 21 level XPS peaks for O-H,  $\text{O}_x$ , and their ratio O-H/ $\text{O}_x$ .

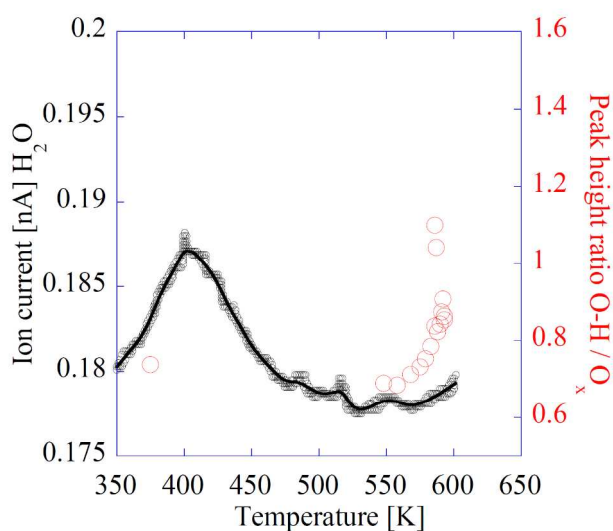

22  
 23 **Figure S3:** Ion current from water release (solid line from 350 K to 600 K) and XPS peak  
 24 height ratio for O-H/ $\text{O}_x$ .
